# Supplementary material for: Fatty acid composition and phospholipid types used in infant formulas modifies the establishment of human gut bacteria in germ-free mice
Source: PubMed Central journal article supplement (PMC5479857; doi:10.1038/s41598-017-04298-0), 2017-06-21
Supplement: 41598_2017_4298_MOESM1_ESM.pdf [file 41598_2017_4298_MOESM1_ESM.pdf]

**Supplementary data for:**

**Fatty acid composition and phospholipid types used in infant formulas  
modifies the establishment of human gut bacteria in germ-free mice**

by

Rikke Guldhammer Nejrup, Tine Rask Licht and Lars Ingvar Hellgren

**Content:**

Supplementary Figures S1-S6.

# Peroxide values in emulsions

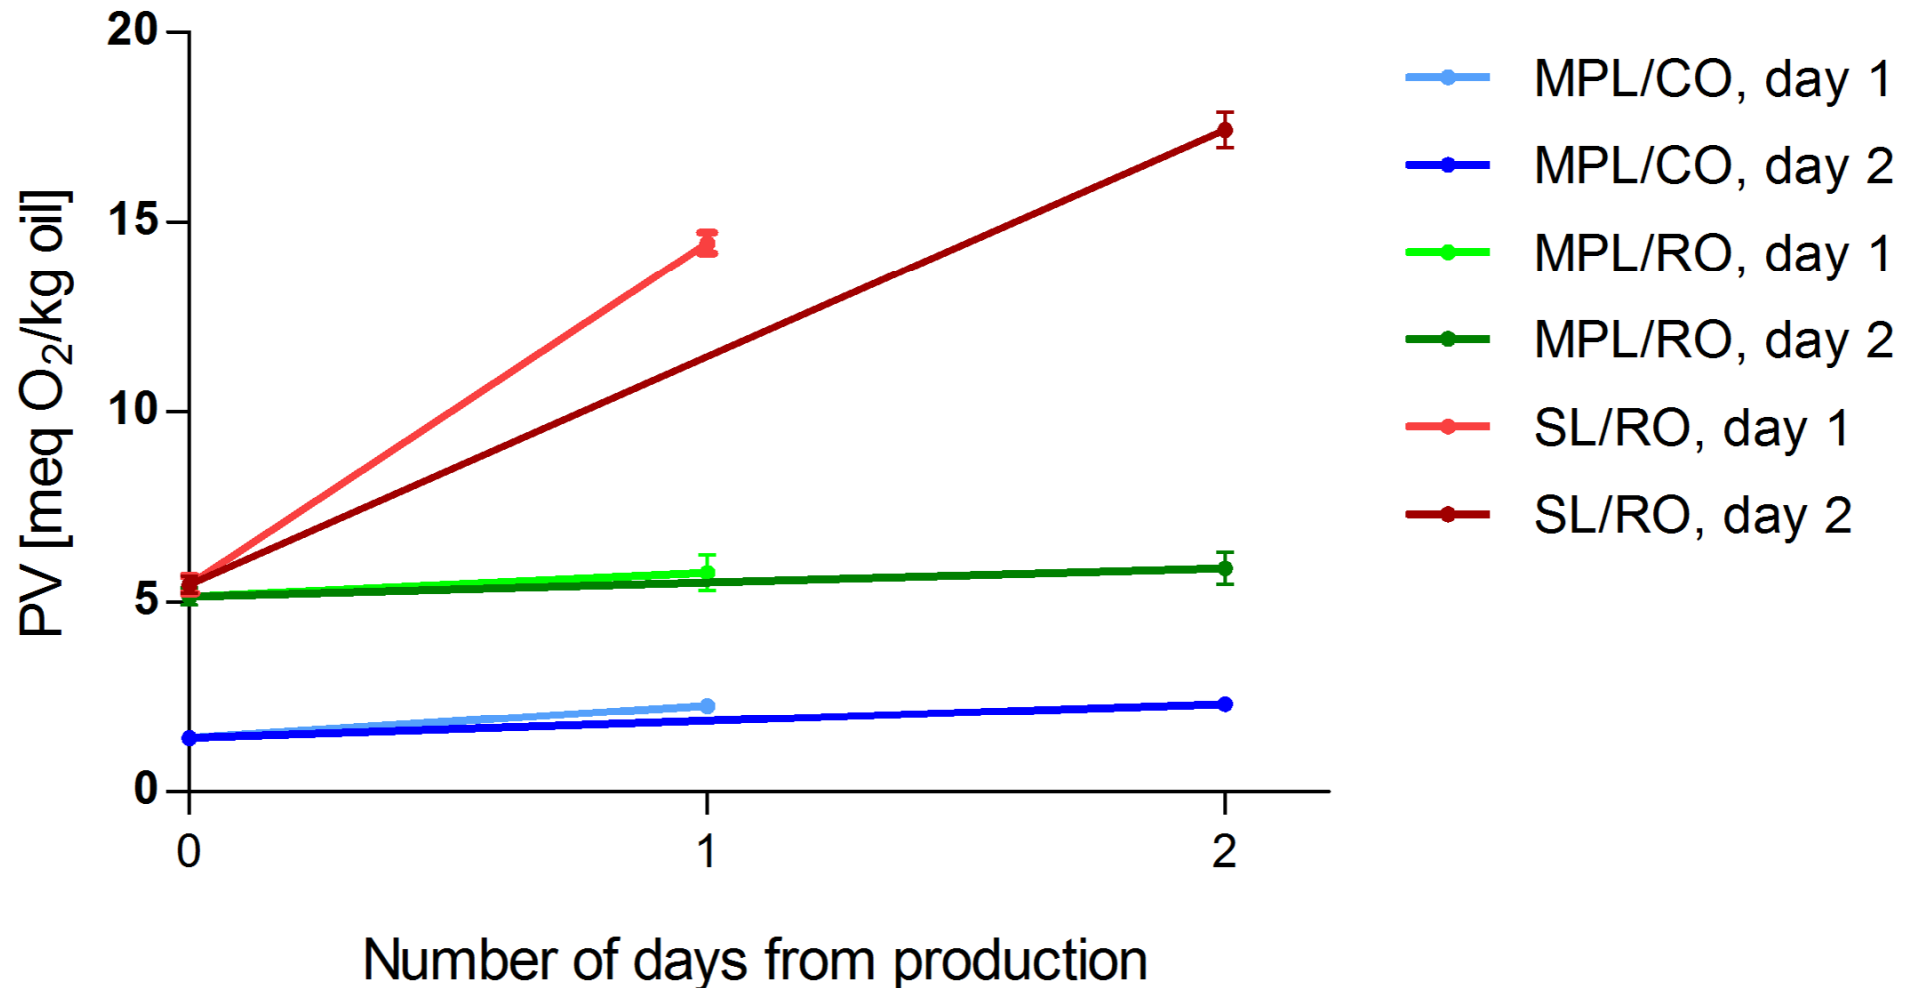

**Figure S1** Peroxide values in emulsions over time. Values are shown in milliequivalent (meq) O<sub>2</sub>/kg oil. Values are measured right after production (day 0), and here after at day 1 and 2, respectively. Day 1 refers to the measurement after 24 hrs at RT, while day 2 refers to 24 hrs storage (+4°C for MPL/Rapeseed (RO) and SL/RO, RT for MPL/Coconut oil (CO)) followed by 24 hrs at RT

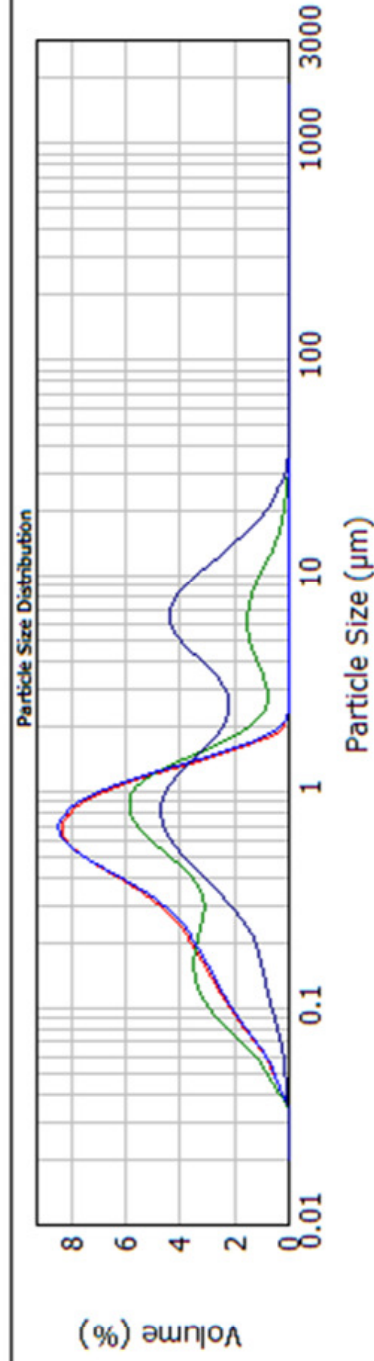

- Day 0 MPL+Coconut, 18. december 2013 17:20:01
- Day 1 MPL+Coconut (40C), 19. december 2013 14:58:18
- Day 1 MPL+Coconut (20oC), 19. december 2013 15:07:37
- Day 2 MPL+Coconut, 20. december 2013 14:33:26

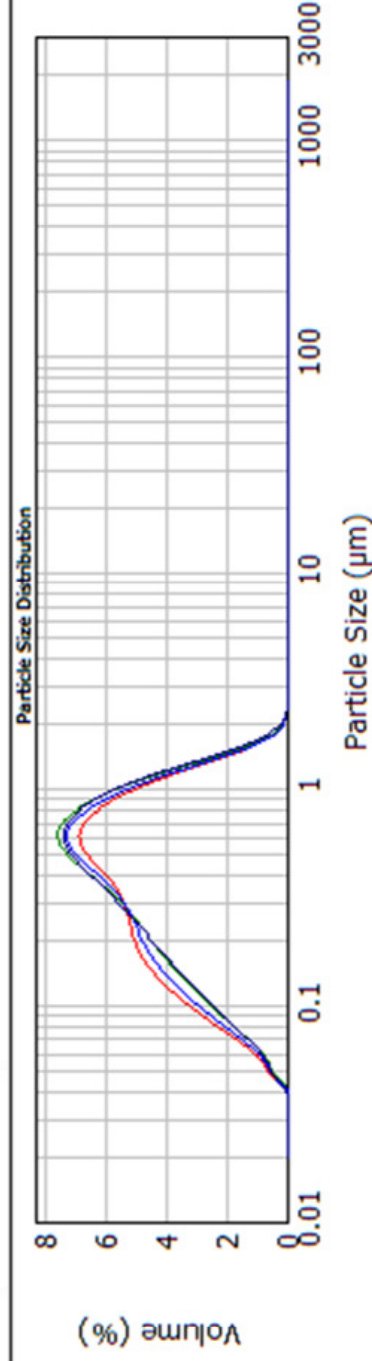

- Day 0 MPL+Rapeseed, 18. december 2013 17:06:45
- Day 1 MPL+Rapeseed (4oC), 19. december 2013 14:30:40
- Day 1 MPL+Rapeseed (20oC), 19. december 2013 14:39:42
- Day 2 MPL+Rapeseed, 20. december 2013 14:24:55

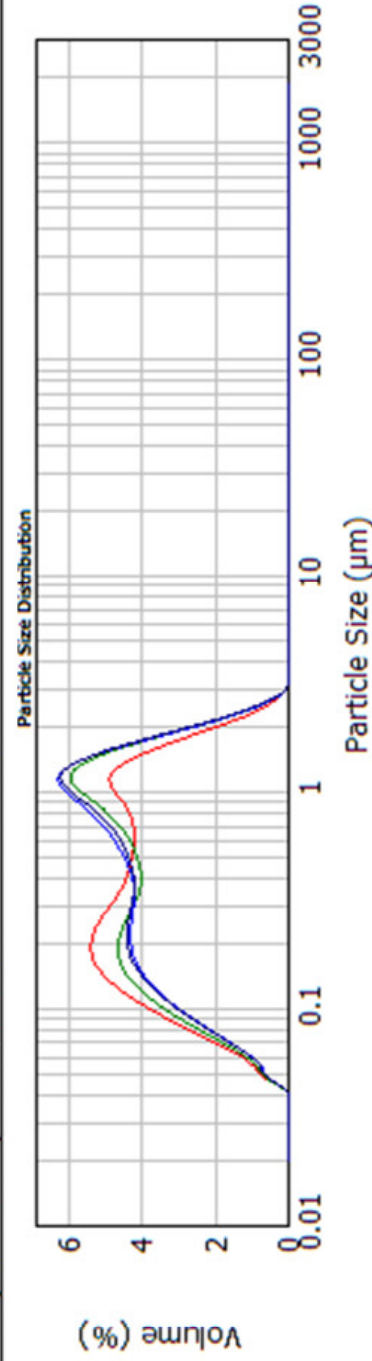

- Day 0 SL+Rapeseed, 18. december 2013 17:15:16
- Day 1 SL+Rapeseed (4oC), 19. december 2013 14:35:15
- Day 1 SL+Rapeseed (20oC), 19. december 2013 14:52:56
- Day 2 SL+Rapeseed, 20. december 2013 14:29:02

**Figure S2 Particle size [ $\mu\text{m}$ ] distribution of lipid droplets in emulsions.** A: MPL/CO, B: MPL/RO, C: SL/RO. Colors refer to: day 0 (red) corresponding to the production day, day 1 after storage at  $+4^\circ\text{C}$  for 24 hrs (green), day 1 after 24 hrs at  $+20^\circ\text{C}$  (light blue) and day 2 after storage at  $+4^\circ\text{C}$  for 24 hrs followed by 24 hrs at  $+20^\circ\text{C}$  (dark blue).

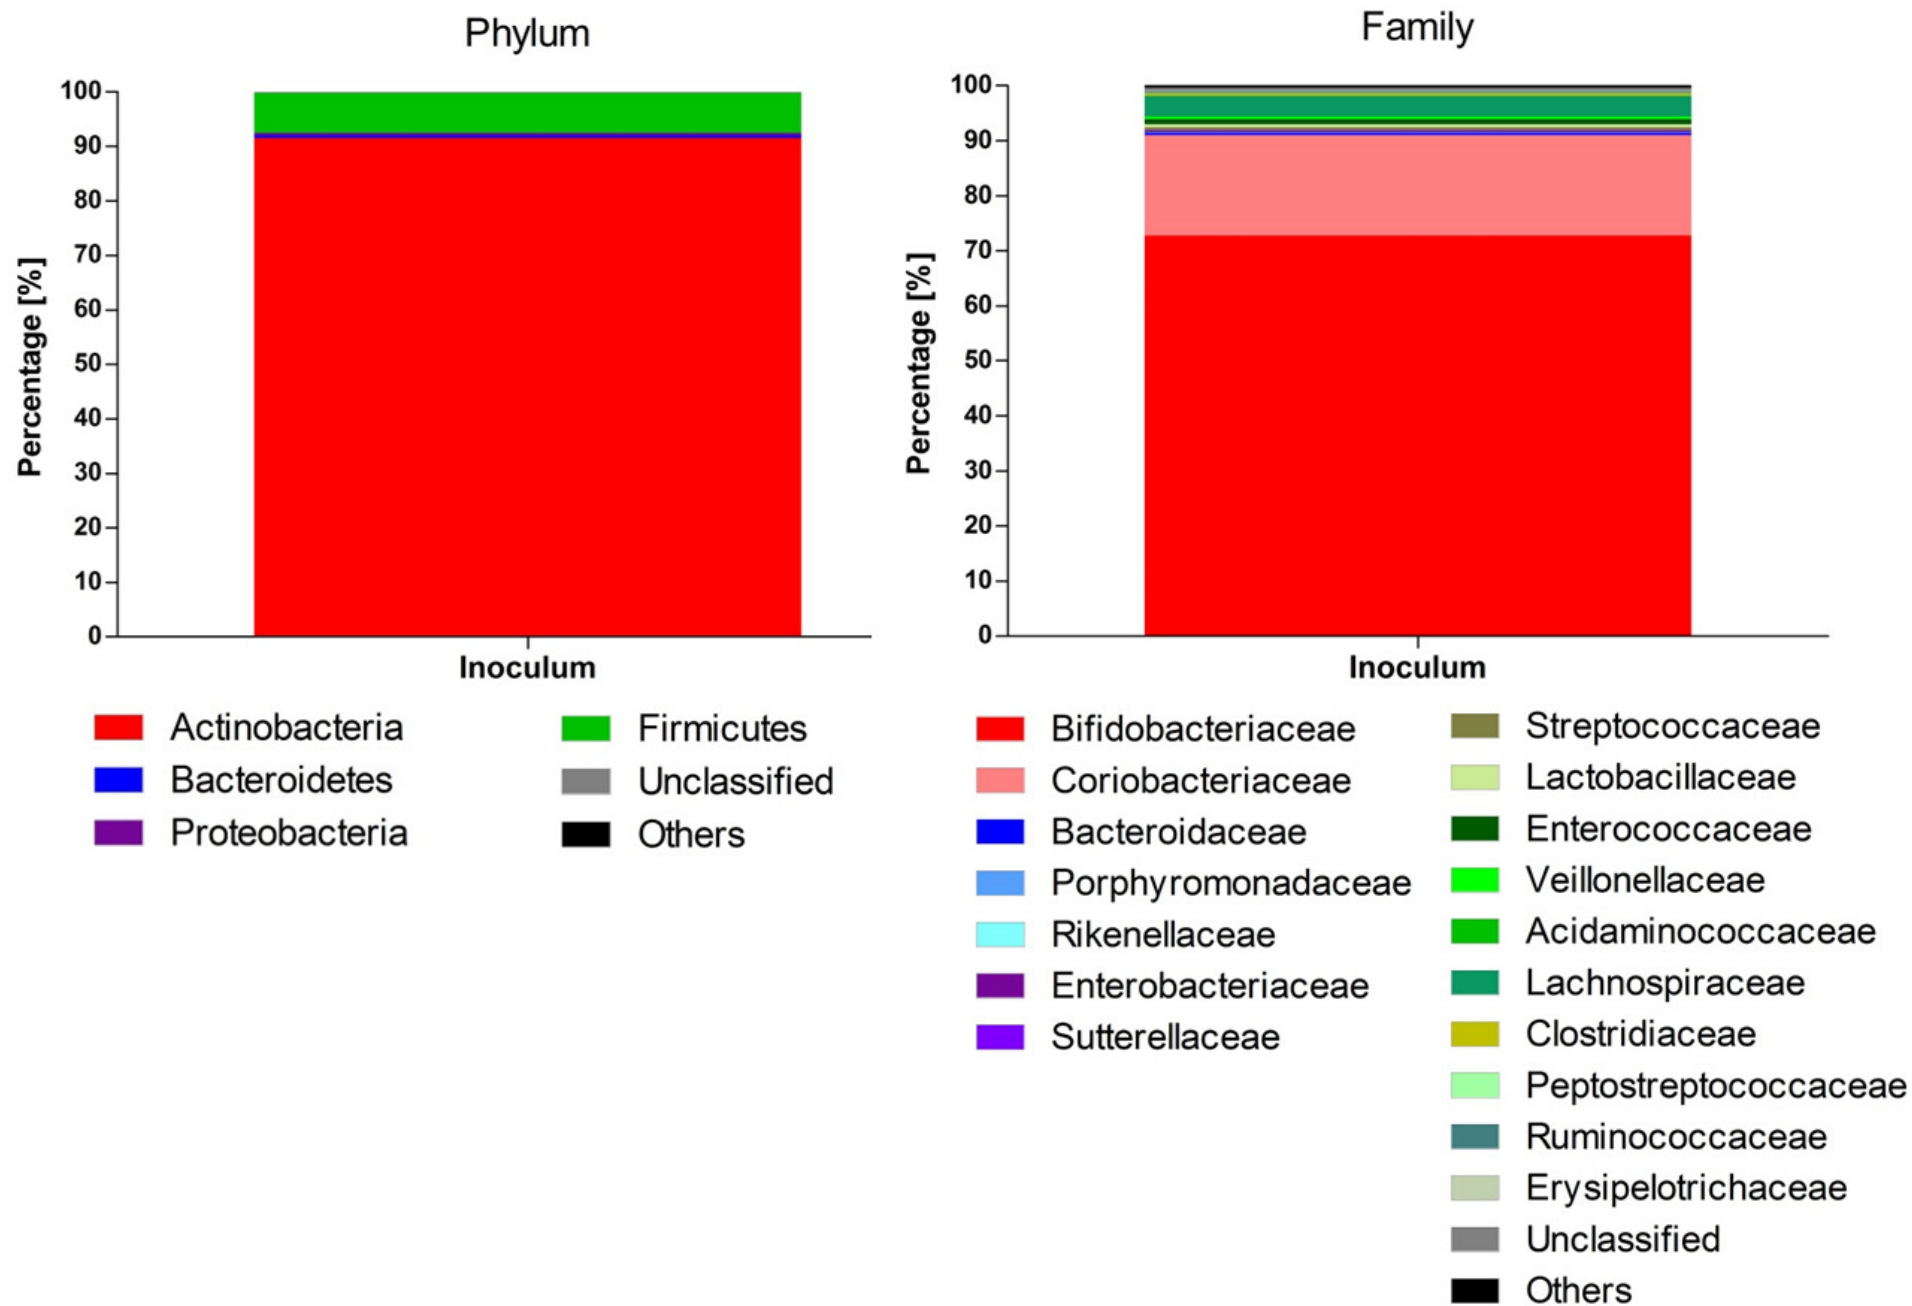

**Figure S3 Bacterial distribution in inoculum.** Left: phylum level, Right: Family level. Color matches between families and their corresponding phylum.



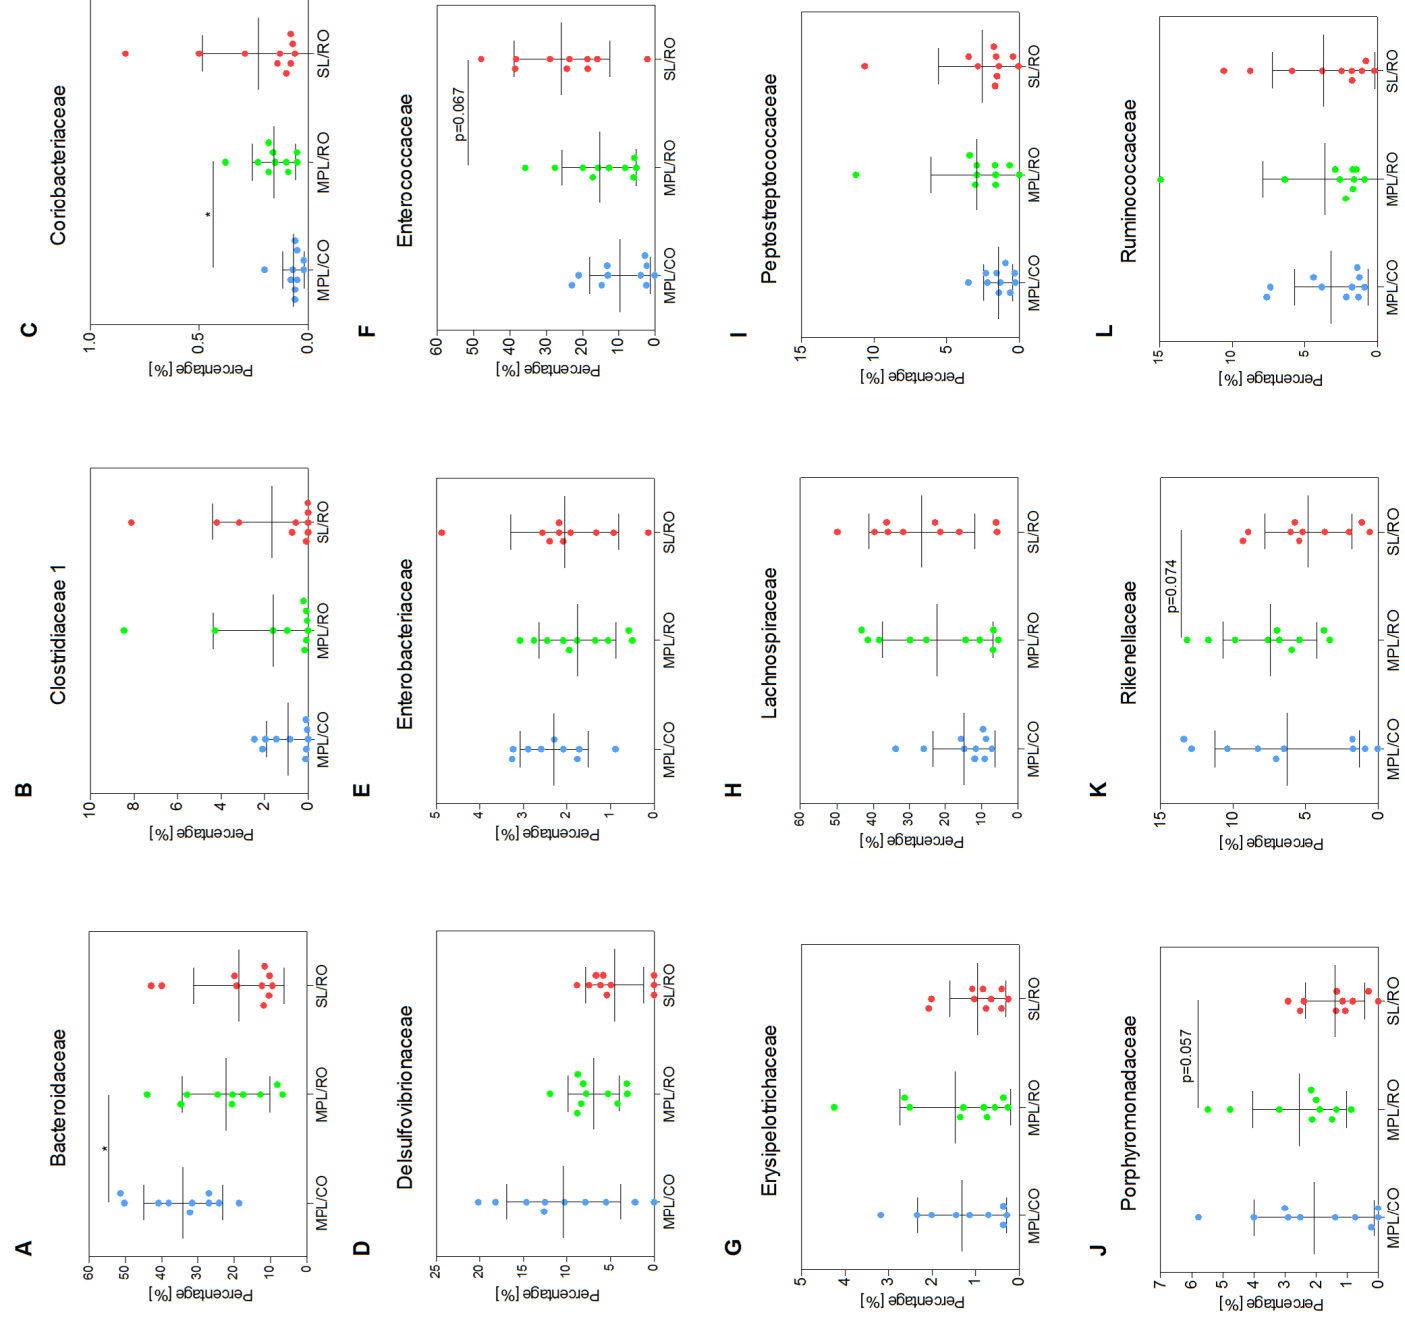

**Figure S5 Percentage-wise bacterial distribution in cecum.** Distributions are shown for A: Bacteroidaceae, B: Clostridiaceae 1, C: Coriobacteriaceae, D: Desulfovibrionaceae, E: Enterobacteriaceae, F: Enterococcaceae, G: Erysipelotrichaceae, H: Lachnospiraceae, I: Peptostreptococcaceae, J: Porphyromonadaceae, K: Rikenellaceae and L: Ruminococcaceae. Data are shown as percentage with mean $\pm$ SD, n = 10. Number of asterisks indicate significant p-values (\* p<0.05). No differences were found between groups within the same day. Any significant difference within groups over time is not illustrated. NB: Y-axes are not identical.

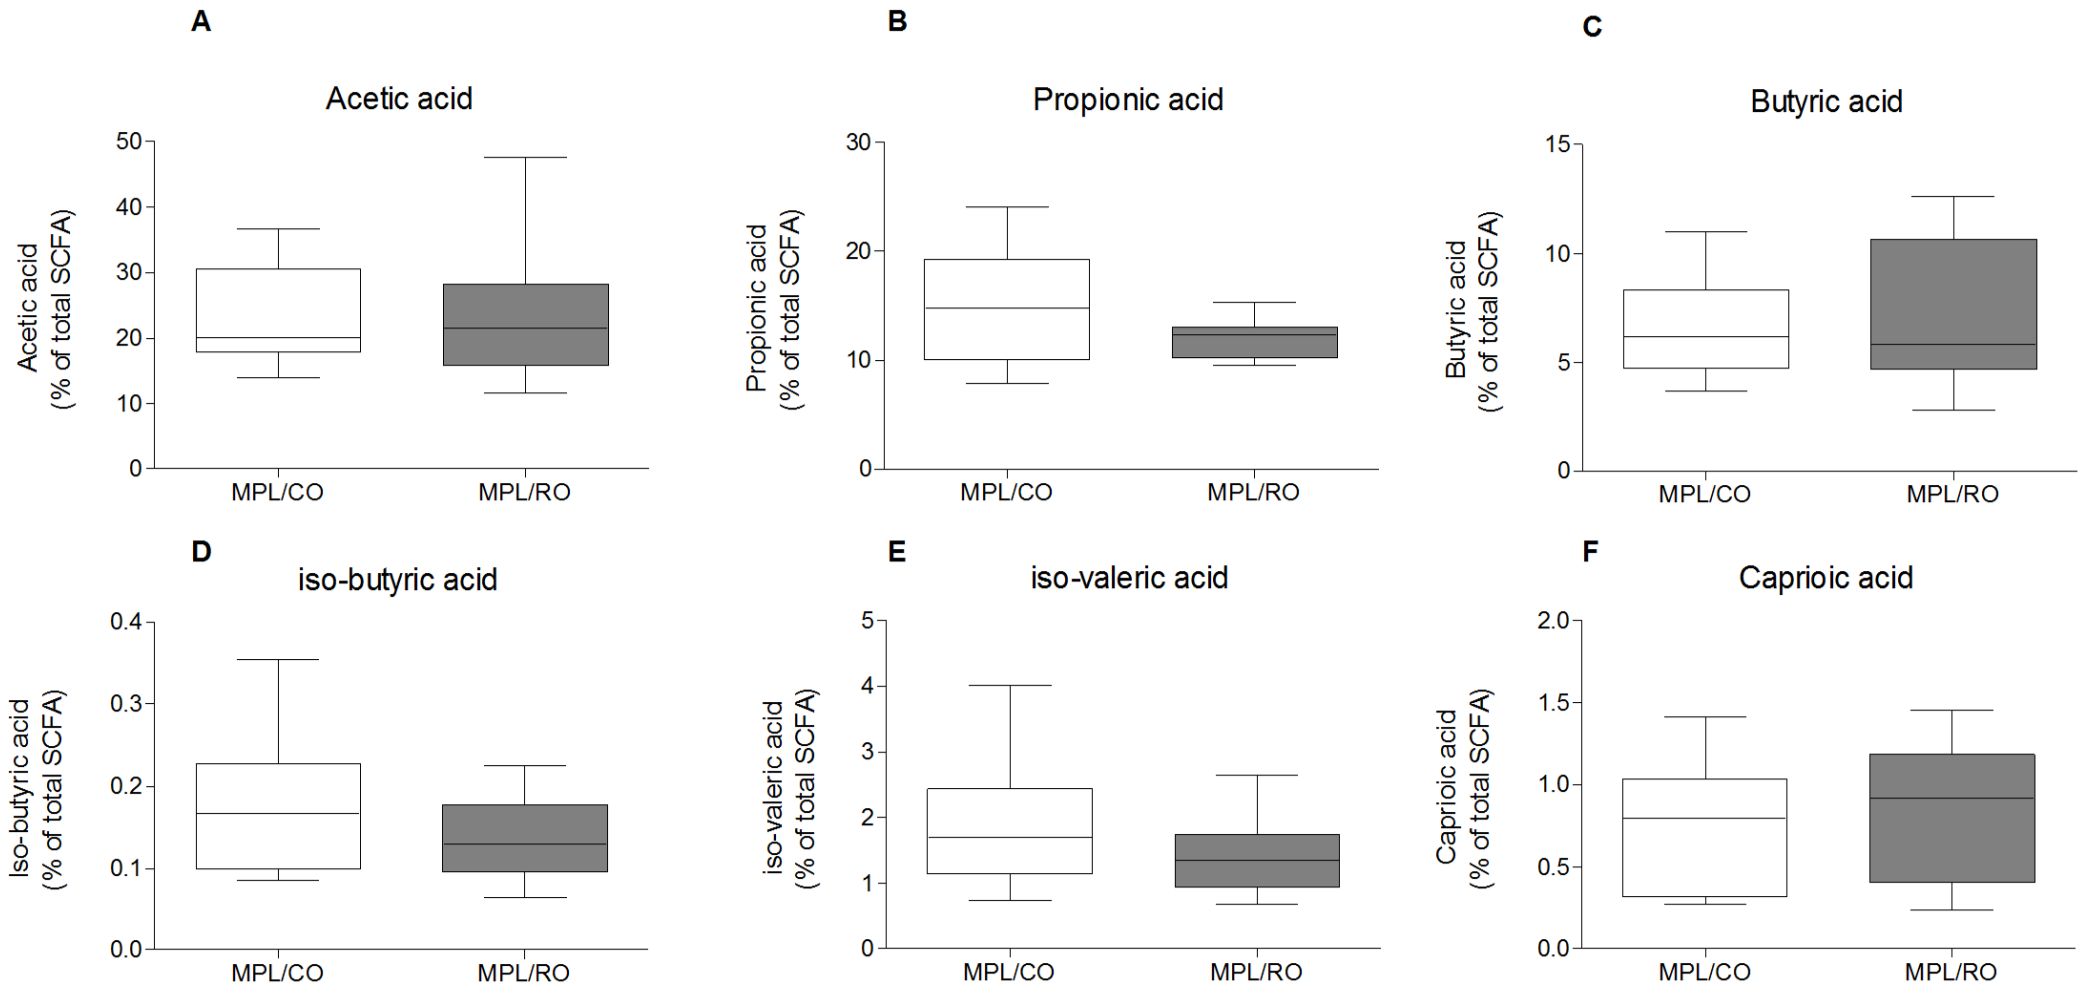

**Figure S6 Effect of oil on short-chain fatty acid (SCFA) production in cecum.** Levels of SCFAs are illustrated as percentage of total SCFAs. A: Acetic acid, B: Propionic acid, C: Butyric acid, D: iso-Valeric acid, E: iso-Butyric acid, and F: Caprioic acid. Differences between groups are calculated using student's t-test using a significance level of  $p=0.05$ . No differences were observed between groups.
